# Supplementary material for: Early Bronchoscopy Improves Extubation Rates after Out-of-Hospital Cardiac Arrest: A Retrospective Cohort Analysis
Source: MDPI journal article supplement (doi:10.3390/jcm10143055), 2021-07-09
Supplement: s1 [file s1]

Supplementary Material.

**Table S1. Baseline Clinical and Demographic Characteristics of 111 patients after OHCA and early or late bronchoscopy**

|                                                               | All patients with<br>Bronchoscopy<br><i>n</i> (%) | Early Bronchoscopy<br>( $< 48$ hrs)<br><i>n</i> (%) | Late Bronchoscopy<br>( $> 48$ hrs)<br><i>n</i> (%) | <i>p</i> -value |
|---------------------------------------------------------------|---------------------------------------------------|-----------------------------------------------------|----------------------------------------------------|-----------------|
| Patients                                                      | 111                                               | 91                                                  | 20                                                 |                 |
| Female                                                        | 31 (27.9)                                         | 21 (23.1)                                           | 10 (50.0)                                          | 0.015           |
| Age (yrs.)                                                    | 63.7 $\pm$ 15.4                                   | 62.7 $\pm$ 15.7                                     | 67.9 $\pm$ 13.6                                    | 0.179           |
| Ongoing CPR on admission                                      | 12 (10.8)                                         | 9 (9.9)                                             | 3 (15.0)                                           | 0.450           |
| Shockable rhythm                                              | 74 (66.6)                                         | 59 (64.8)                                           | 15 (75.0)                                          | 0.383           |
| Cause of OHCA                                                 |                                                   |                                                     |                                                    |                 |
| Myocardial ischemia                                           | 66 (59.5)                                         | 52 (57.1)                                           | 14 (70.0)                                          | 0.289           |
| Pulmonary embolism                                            | 6 (5.4)                                           | 5 (5.5)                                             | 1 (5.0)                                            | 1.000           |
| Rhythm event                                                  | 13 (14.3)                                         | 12 (13.2)                                           | 1 (5.0)                                            | 0.457           |
| Unknown/other                                                 | 26 (23.4)                                         | 22 (24.2)                                           | 4 (20.0)                                           | 0.779           |
| Time to ROSC (min.)                                           | 18.9 $\pm$ 15.9                                   | 17.8 $\pm$ 14.7                                     | 25.8 $\pm$ 22.2                                    | 0.166           |
| CVRF                                                          |                                                   |                                                     |                                                    |                 |
| Arterial hypertension                                         | 60 (54.1)                                         | 50 (55.0)                                           | 10 (50.0)                                          | 0.688           |
| Hyperlipoproteinemia                                          | 42 (37.8)                                         | 34 (37.4)                                           | 8 (40.0)                                           | 0.826           |
| Active nicotine abuse                                         | 41 (37.0)                                         | 36 (40.0)                                           | 5 (25.0)                                           | 0.222           |
| Pre-existing heart failure                                    | 21 (19.0)                                         | 20 (22.0)                                           | 1 (5.0)                                            | 0.115           |
| Pre-existing heart rhythm disorder (e.g. atrial fibrillation) | 25 (22.5)                                         | 17 (18.7)                                           | 8 (40.0)                                           | 0.039           |
| Pre-existing pulmonary disease (e.g. COPD)                    | 19 (17.1)                                         | 16 (17.6)                                           | 3 (15.0)                                           | 1.000           |
| Diabetes type 2                                               | 20 (18.0)                                         | 15 (16.5)                                           | 5 (25.0)                                           | 0.370           |
| Family history of SCD                                         | 9 (8.1)                                           | 8 (8.8)                                             | 1 (5.0)                                            | 1.000           |
| Laboratory measurements                                       |                                                   |                                                     |                                                    |                 |
| Lactate (mmol/l) day 1                                        | 6.81 $\pm$ 6.06                                   | 6.65 $\pm$ 6.06                                     | 7.64 $\pm$ 6.25                                    | 0.608           |
| Lactate (mmol/l) day 3                                        | 2.80 $\pm$ 3.10                                   | 2.84 $\pm$ 3.32                                     | 2.59 $\pm$ 1.64                                    | 0.780           |
| Lactate (mmol/l) day 5                                        | 1.50 $\pm$ 1.41                                   | 1.56 $\pm$ 1.56                                     | 1.26 $\pm$ 0.45                                    | 0.437           |
| Lactate (mmol/l) day 7                                        | 1.45 $\pm$ 1.40                                   | 1.51 $\pm$ 1.57                                     | 1.22 $\pm$ 0.52                                    | 0.499           |
| CRP (mg/l) day 1                                              | 21.2 $\pm$ 44.9                                   | 21.6 $\pm$ 47.3                                     | 19.5 $\pm$ 34.3                                    | 0.851           |
| CRP (mg/l) day 3                                              | 163.4 $\pm$ 84.2                                  | 162.7 $\pm$ 87.2                                    | 166.8 $\pm$ 70.4                                   | 0.855           |
| CRP (mg/l) day 5                                              | 157.4 $\pm$ 95.2                                  | 147.0 $\pm$ 91.8                                    | 198.5 $\pm$ 99.8                                   | 0.034           |
| CRP (mg/l) day 7                                              | 121.8 $\pm$ 165.4                                 | 109.2 $\pm$ 180.0                                   | 160.1 $\pm$ 100.3                                  | 0.247           |
| Catecholamine use day 1                                       | 110 (99.1)                                        | 90 (98.9)                                           | 20 (100.0)                                         | 1.000           |
| Catecholamine use day 3                                       | 103 (92.8)                                        | 83 (92.2)                                           | 20 (100.0)                                         | 0.582           |
| Catecholamine use day 5                                       | 65 (58.6)                                         | 48 (52.7)                                           | 17 (85.0)                                          | 0.008           |
| Catecholamine use day 7                                       | 40 (36.0)                                         | 26 (28.6)                                           | 14 (70.0)                                          | 0.003           |
| Ventilation parameters                                        |                                                   |                                                     |                                                    |                 |
| PEEP (mbar) day 1                                             | 6.23 $\pm$ 1.62                                   | 6.29 $\pm$ 1.67                                     | 5.97 $\pm$ 1.39                                    | 0.459           |
| PEEP (mbar) day 3                                             | 6.63 $\pm$ 2.43                                   | 6.58 $\pm$ 2.36                                     | 6.85 $\pm$ 2.79                                    | 0.669           |
| PEEP (mbar) day 5                                             | 6.64 $\pm$ 2.50                                   | 6.50 $\pm$ 2.40                                     | 7.10 $\pm$ 2.83                                    | 0.402           |
| PEEP (mbar) day 7                                             | 6.39 $\pm$ 2.36                                   | 6.45 $\pm$ 2.45                                     | 6.21 $\pm$ 2.20                                    | 0.743           |
| pO <sub>2</sub> /FiO <sub>2</sub> day 1                       | 295.7 $\pm$ 124.2                                 | 297.2 $\pm$ 121.1                                   | 288.2 $\pm$ 141.8                                  | 0.781           |
| pO <sub>2</sub> /FiO <sub>2</sub> day 3                       | 273.8 $\pm$ 100.6                                 | 272.4 $\pm$ 106.4                                   | 279.8 $\pm$ 70.75                                  | 0.774           |
| pO <sub>2</sub> /FiO <sub>2</sub> day 5                       | 292.4 $\pm$ 99.10                                 | 290.7 $\pm$ 102.4                                   | 299.8 $\pm$ 85.96                                  | 0.729           |
| pO <sub>2</sub> /FiO <sub>2</sub> day 7                       | 276.9 $\pm$ 106.9                                 | 278.5 $\pm$ 112.9                                   | 271.7 $\pm$ 87.86                                  | 0.822           |
